# Supplementary material for: Structural and Biochemical Analyses of the Butanol Dehydrogenase from Fusobacterium nucleatum
Source: MDPI journal article supplement (doi:10.3390/ijms24032994), 2023-02-03
Supplement: s1 [file s1]

## Supplementary Data

### Structural and biochemical analyses of the butanol dehydrogenase from *Fusobacterium nucleatum*

Xue Bai <sup>1,2,†</sup>, Jing Lan <sup>1,2,†</sup>, Shanru He <sup>1,2</sup>, Tingting Bu <sup>1,2</sup>, Jie Zhang <sup>1,2</sup>, Lulu Wang <sup>1,2,3</sup>, Xiaoling Jin <sup>1,2</sup>, Yuanchao Mao <sup>1,2</sup>, Wanting Guan <sup>1,2</sup>, Liying Zhang <sup>1,2</sup>, Ming Lu <sup>4</sup>, Hai-long Piao <sup>5</sup>, Inseong Jo <sup>6</sup>, Nam-Chul Ha <sup>7</sup>, Chunshan Quan <sup>1,2</sup>, Ki Hyun Nam <sup>8,9,\*</sup> and Yongbin Xu <sup>1,2,\*</sup>

<sup>1</sup> Department of Bioengineering, College of Life Science, Dalian Minzu University, Dalian 116600, Liaoning, China

<sup>2</sup> Key Laboratory of Biotechnology and Bioresources Utilization of Ministry of Education, College of Life Science, Dalian Minzu University, China

<sup>3</sup> School of Life Science and Biotechnology, Dalian University of Technology, No. 2 Linggong Road, Dalian 116024, Liaoning, China

<sup>4</sup> Shandong Provincial Key Laboratory of Energy Genetics, key Laboratory of Biofuel, Qingdao Institute of Bioenergy and Bioprocess Technology, Chinese Academy of Sciences, Qingdao 266101, Shandong, China

<sup>5</sup> CAS Key Laboratory of Separation Science for Analytical Chemistry, Dalian Institute of Chemical Physics, Chinese Academy of Sciences, Dalian 116023, Liaoning, China

<sup>6</sup> Infectious Diseases Therapeutic Research Center, Korea Research Institute of Chemical Technology, Daejeon 34114, Republic of Korea

<sup>7</sup> Department of Agricultural Biotechnology, College of Agriculture and Life Sciences, Seoul National University, Gwanak-gu, Seoul 00826, Republic of Korea

<sup>8</sup> Department of Life Science, Pohang University of Science and Technology, 35398 Pohang, Republic of Korea

<sup>9</sup> POSTECH Biotech Center, Pohang University of Science and Technology, 35398 Pohang, Republic of Korea

\*Correspondence: structures@postech.ac.kr (K.H.N.); yongbinxu@dlnu.edu.cn (Y.X.)

† Both authors contributed equally to this work.

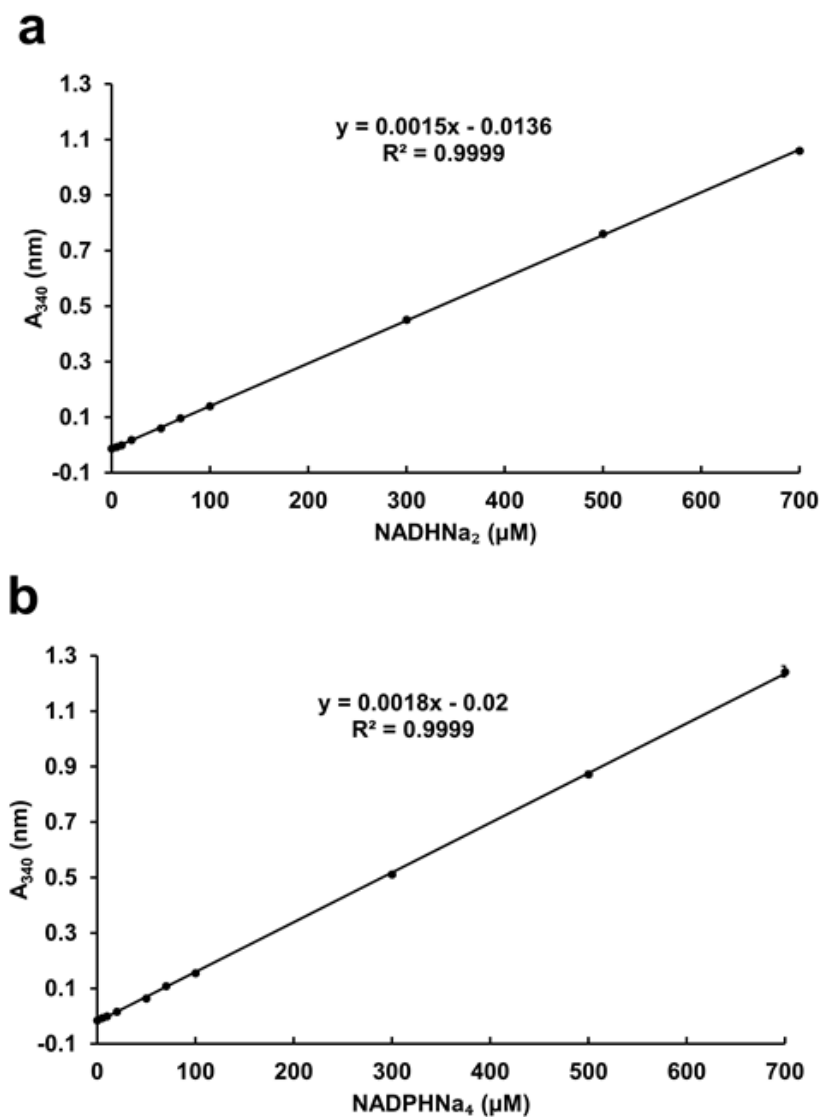

**Figure S1.** Calibration working curve constructed from the average slopes of (a) NADH, and (b) NADPH standards (0-700 μM), obtained from the three-fold assay repetition.

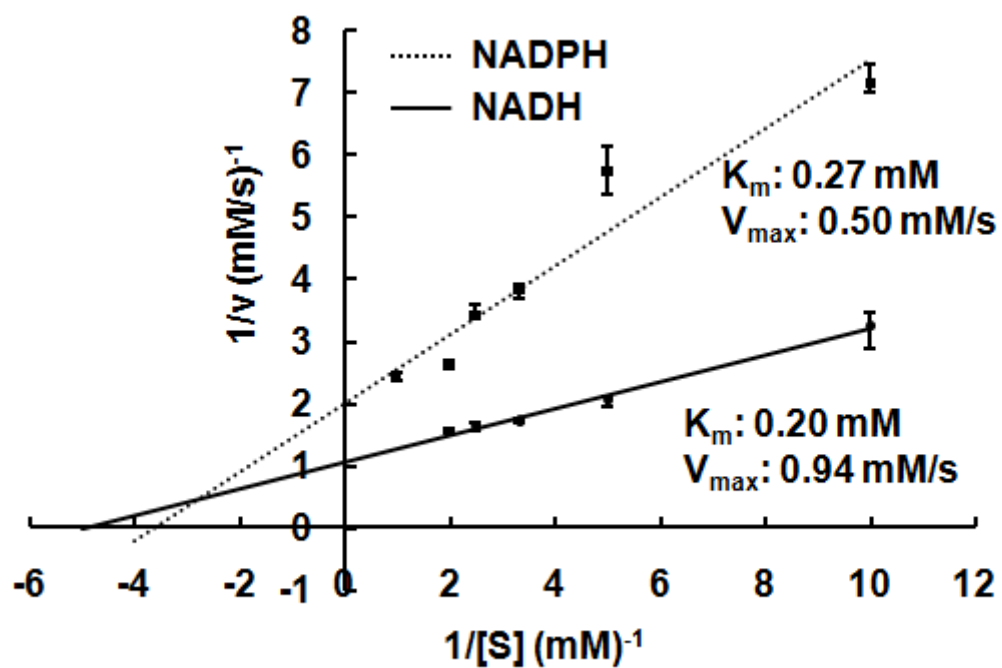

**Figure S2.** The double reciprocal plot was used to calculate  $V_{max}$  and  $K_m$  of the enzyme in the presence of NADH and NADPH. Data represent average  $\pm$  SD of three different samples.

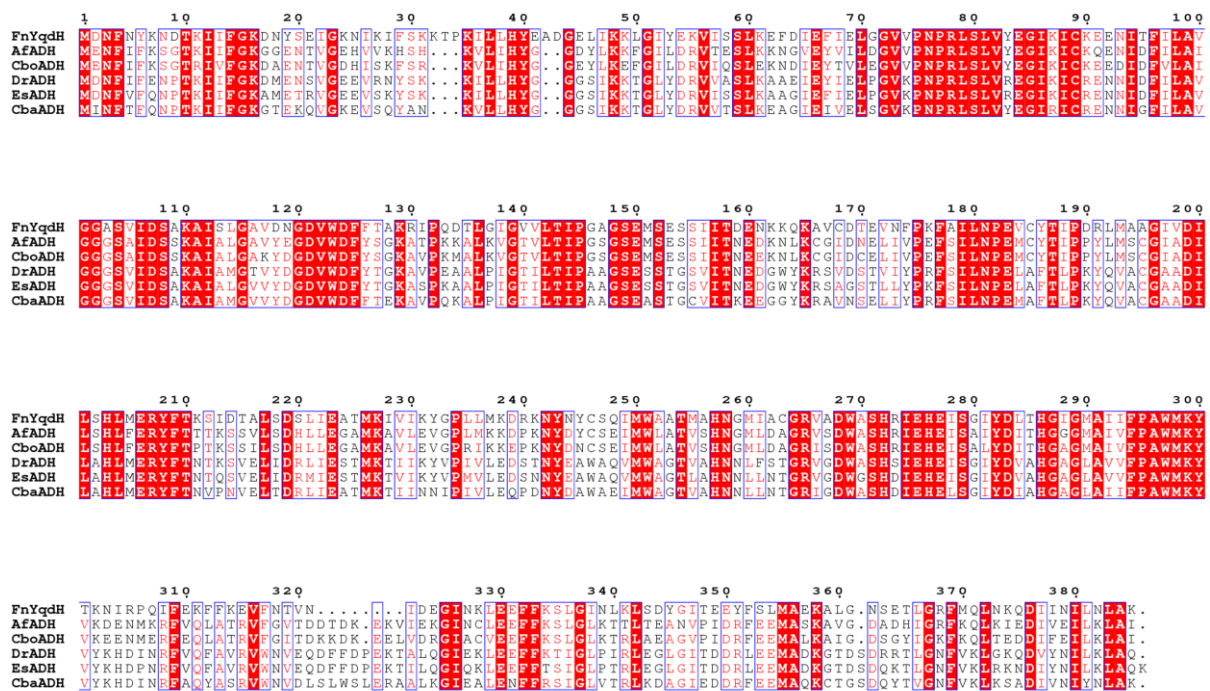

**Figure S3.** Sequence alignment of FnYqdH and homologous proteins. Sequence alignment of FnYqdH, AfADH (NCBI Reference Sequence: WP\_066501503.1), CboADH (GenBank: QGU94363.1), DrADH (NCBI Reference Sequence: WSLF01000004), EsADH (GenBank: NLK98329.1) and CbaADH (GenBank: NLY43117.1)

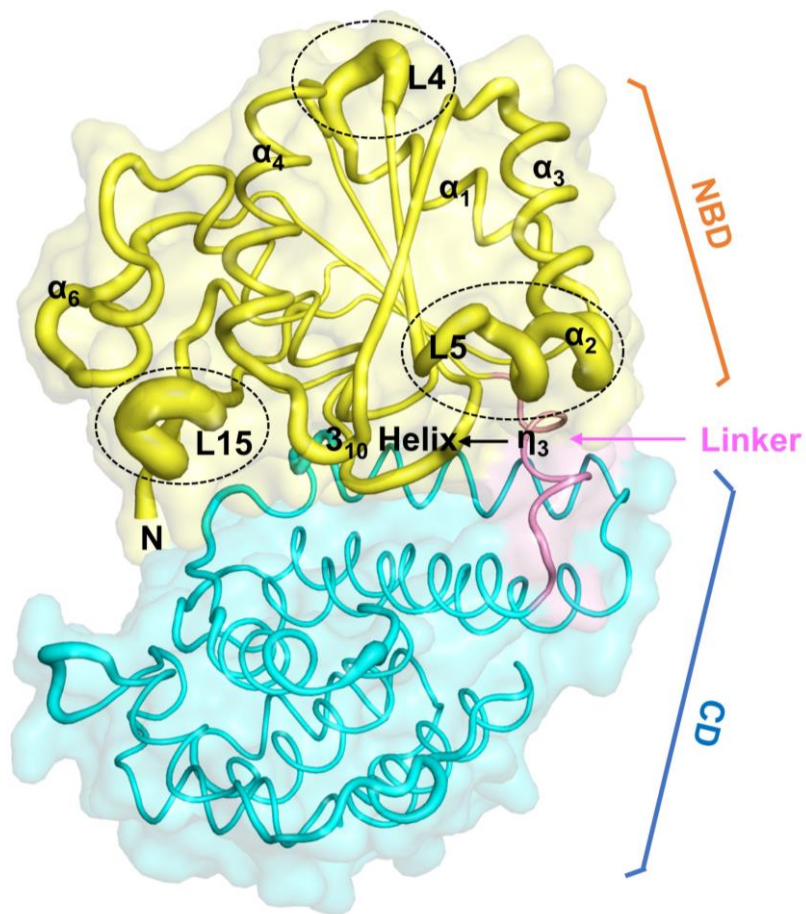

**Figure S4.** Analysis of the flexible region of FnYqdh. B-factor representation of FnYqdh;  $\alpha_2$ , L4, L5, and L15 show relatively high flexibility.

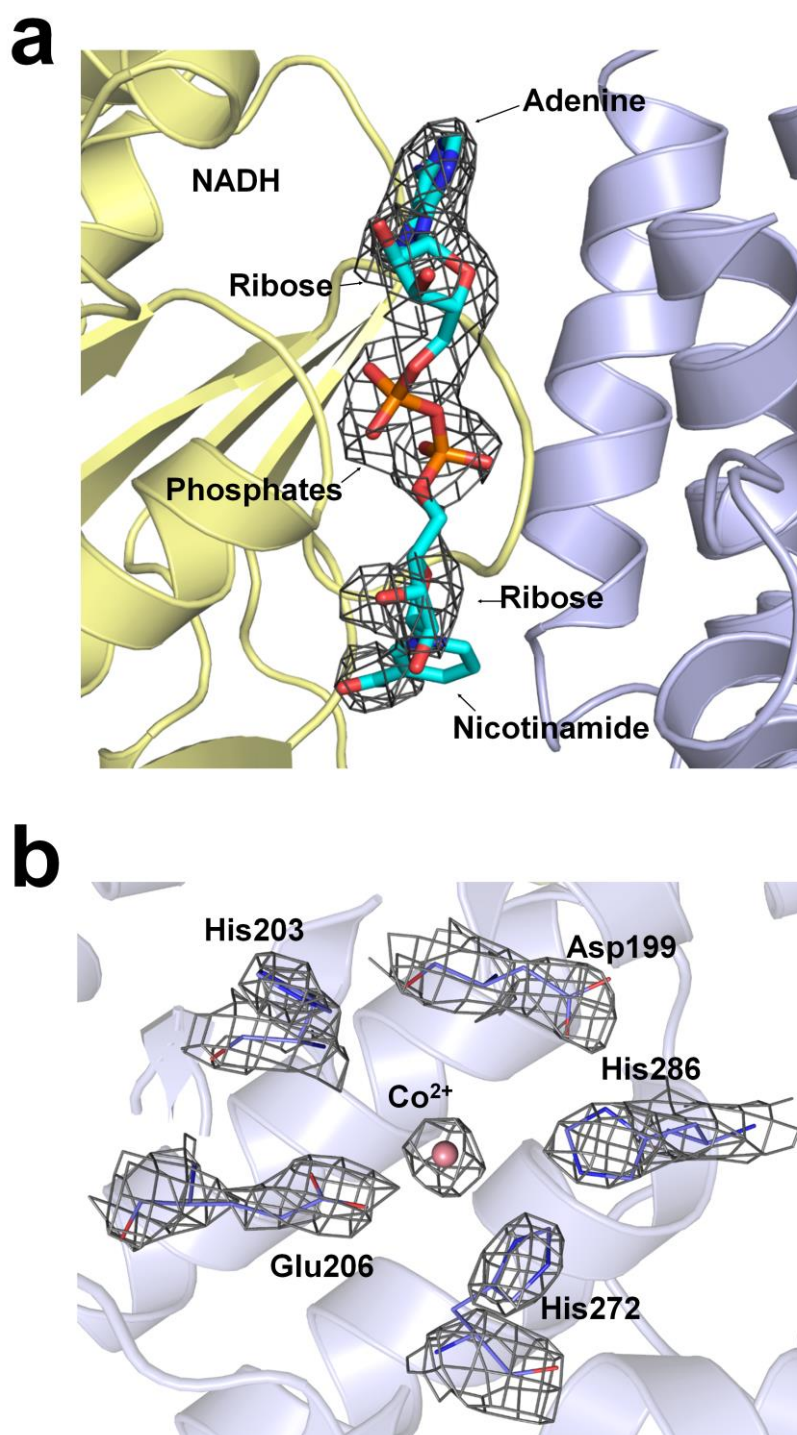

**Figure S5.** The electron density map of NADH and  $\text{Co}^{2+}$ . The electron density map of (a) NADH and (b)  $\text{Co}^{2+}$  are shown as grey mesh.

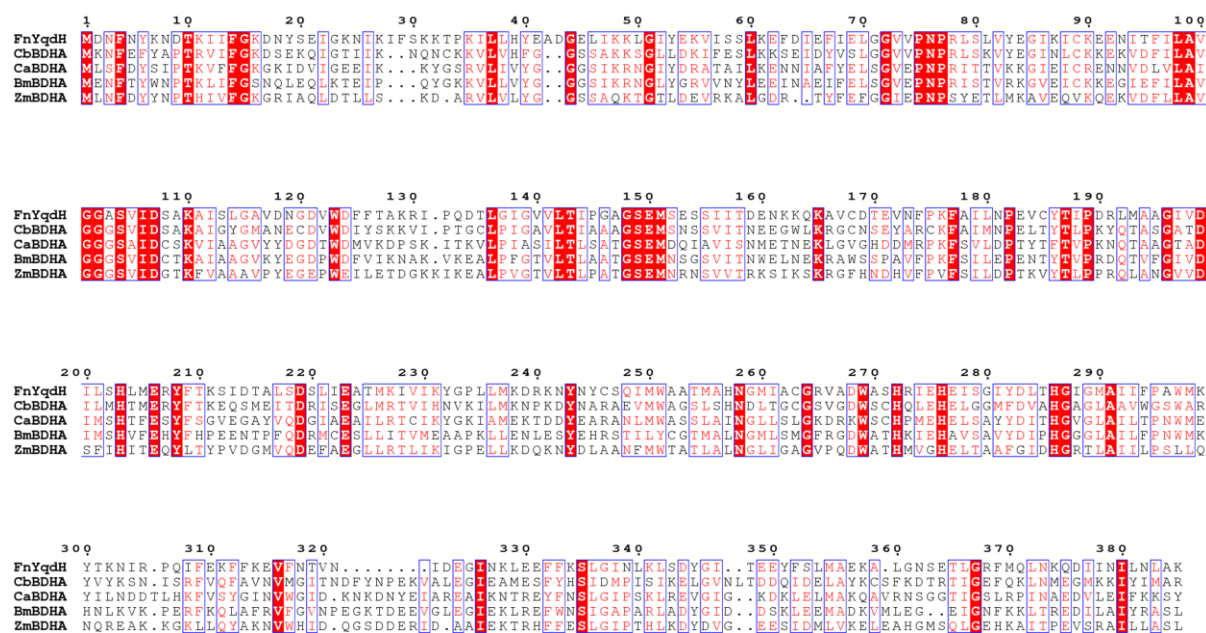

**Figure S6.** Sequence alignment of FnYqdH with BHD from *C. beijerinckii* (CbBDH, Accession No.: WP\_077844128.1), *C. acetobutylicum* (CaBDHA, WP\_010966572.1), *Bacillus megaterium* (BmBDHA, WP\_013085305), and *Zymomonas mobilis* (ZmBDHA, WP\_011241511.1).



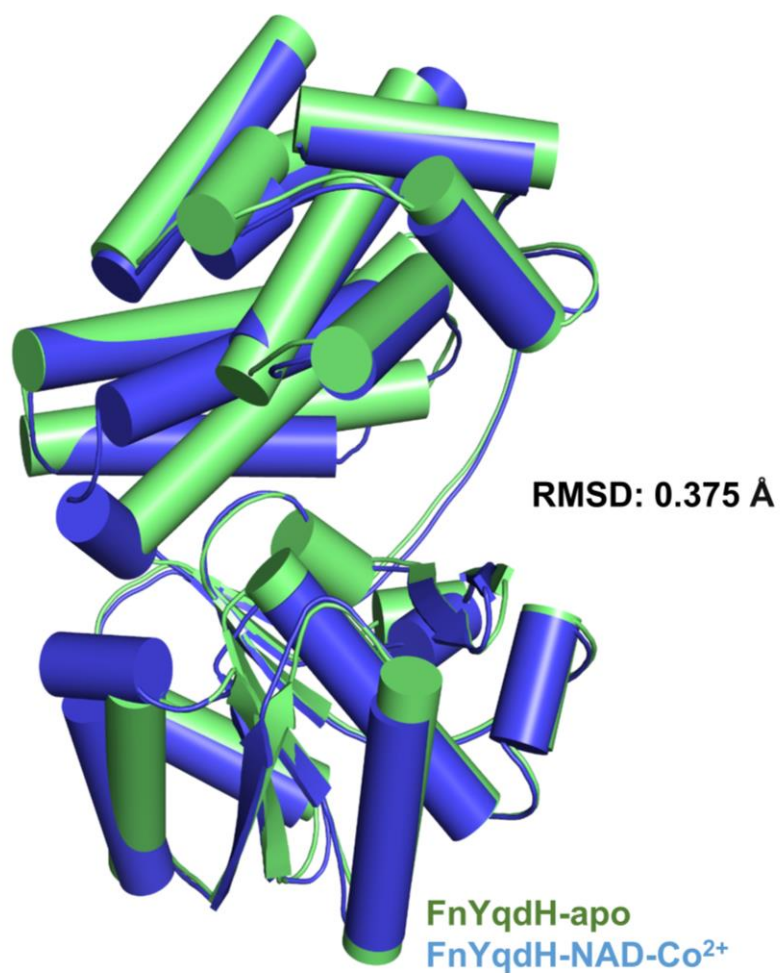

**Figure S7.** Overall fold of FnYqdH-apo and FnYqdH-NAD-Co<sup>2+</sup>. Comparison of the structures of the FnYqdH-apo and FnYqdH-NAD-Co<sup>2+</sup>. The crystal structures of the FnYqdH-apo and FnYqdH-NAD-Co<sup>2+</sup> are colored green and blue, respectively.



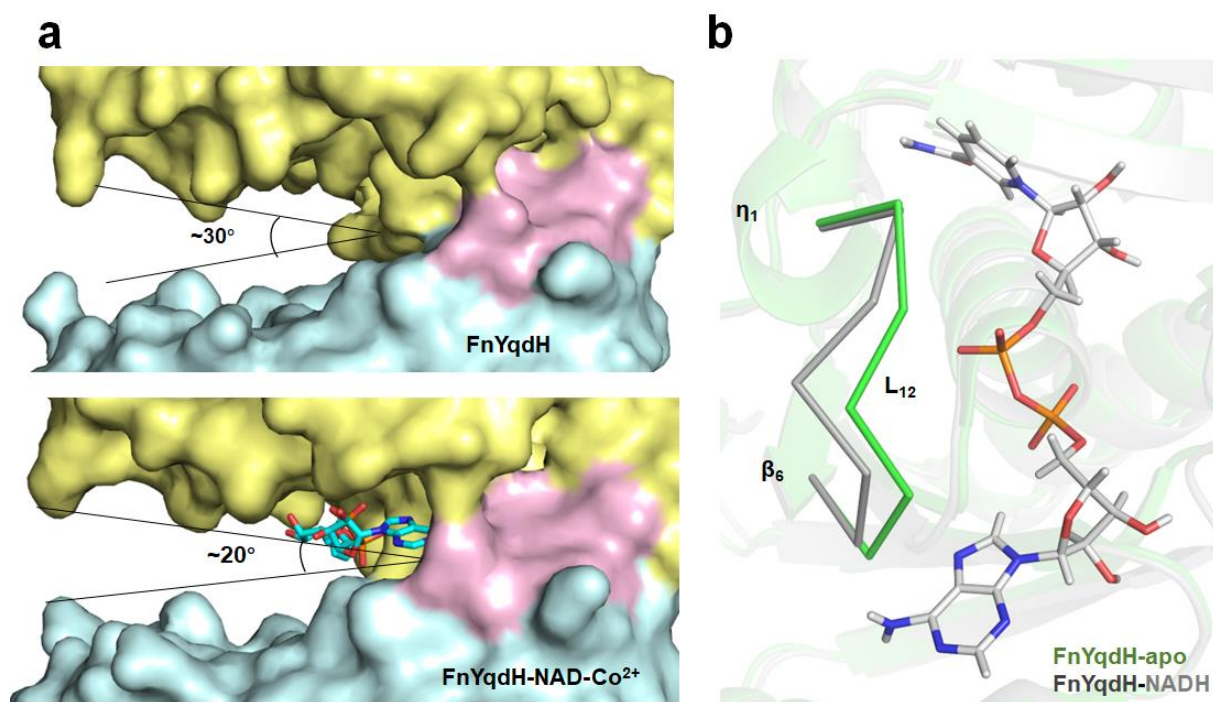

**Figure S8.** Comparison of FnYqdh-apo and FnYqdh-NAD-Co<sup>2+</sup>. (a) Surface comparison of FnYqdh-apo and FnYqdh-NAD-Co<sup>2+</sup>. (b) Cartoon compilation of FnYqdh-apo and FnYqdh-NAD-Co<sup>2+</sup>. FnYqdh-apo and FnYqdh-NAD-Co<sup>2+</sup> are colored green and grey, respectively.

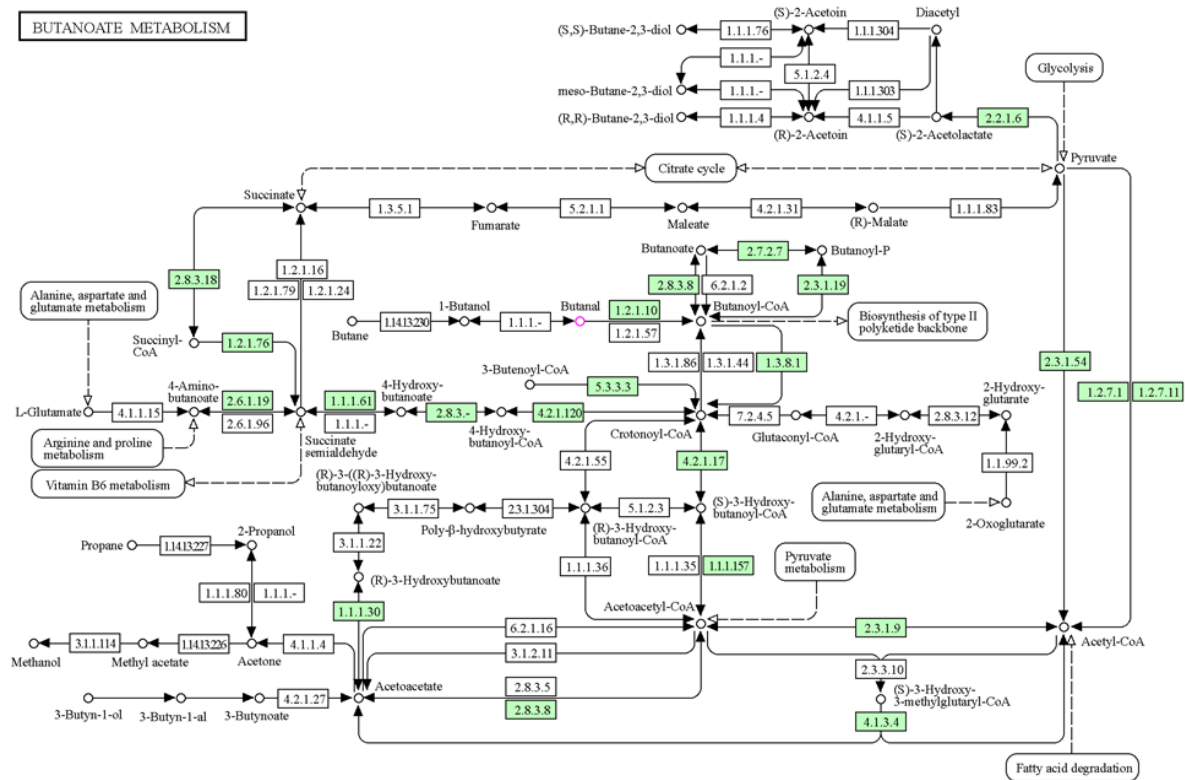

**Figure S9.** Butanoate metabolism of *Clostridioides difficile*.

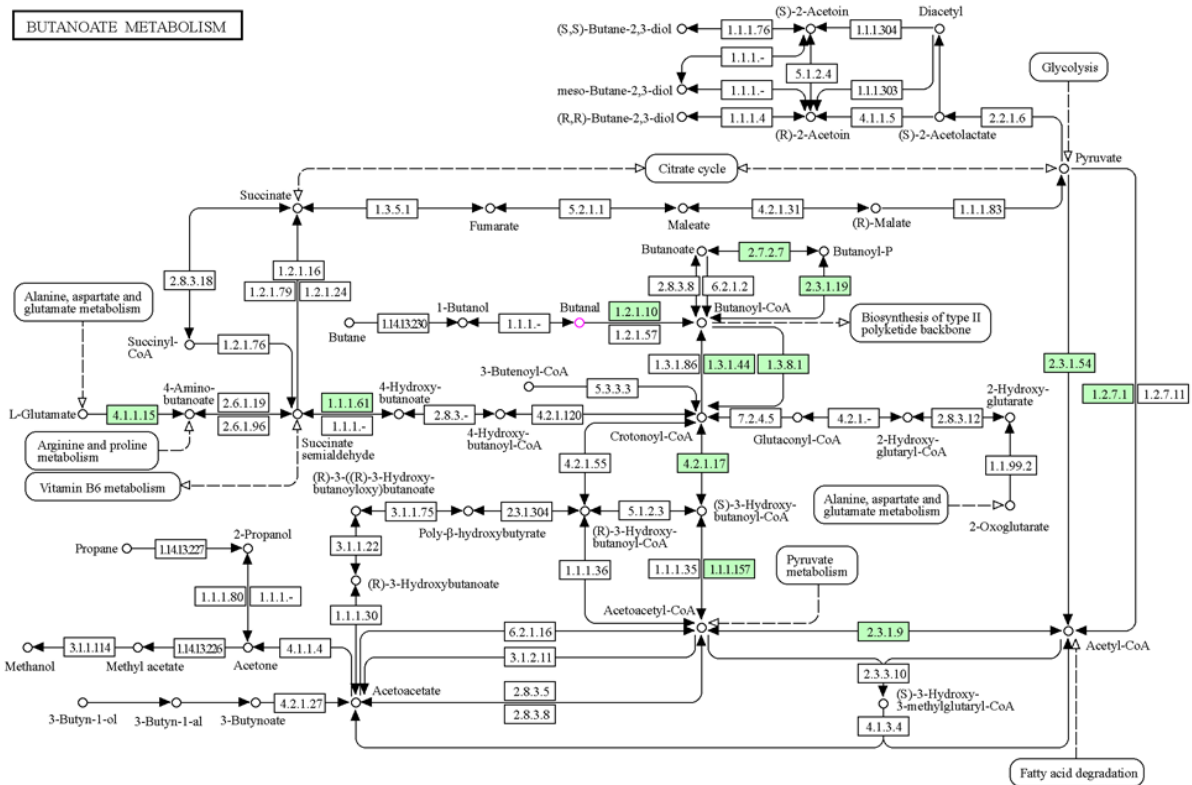

**Figure S10.** Butanoate metabolism of *Clostridium perfringens*.

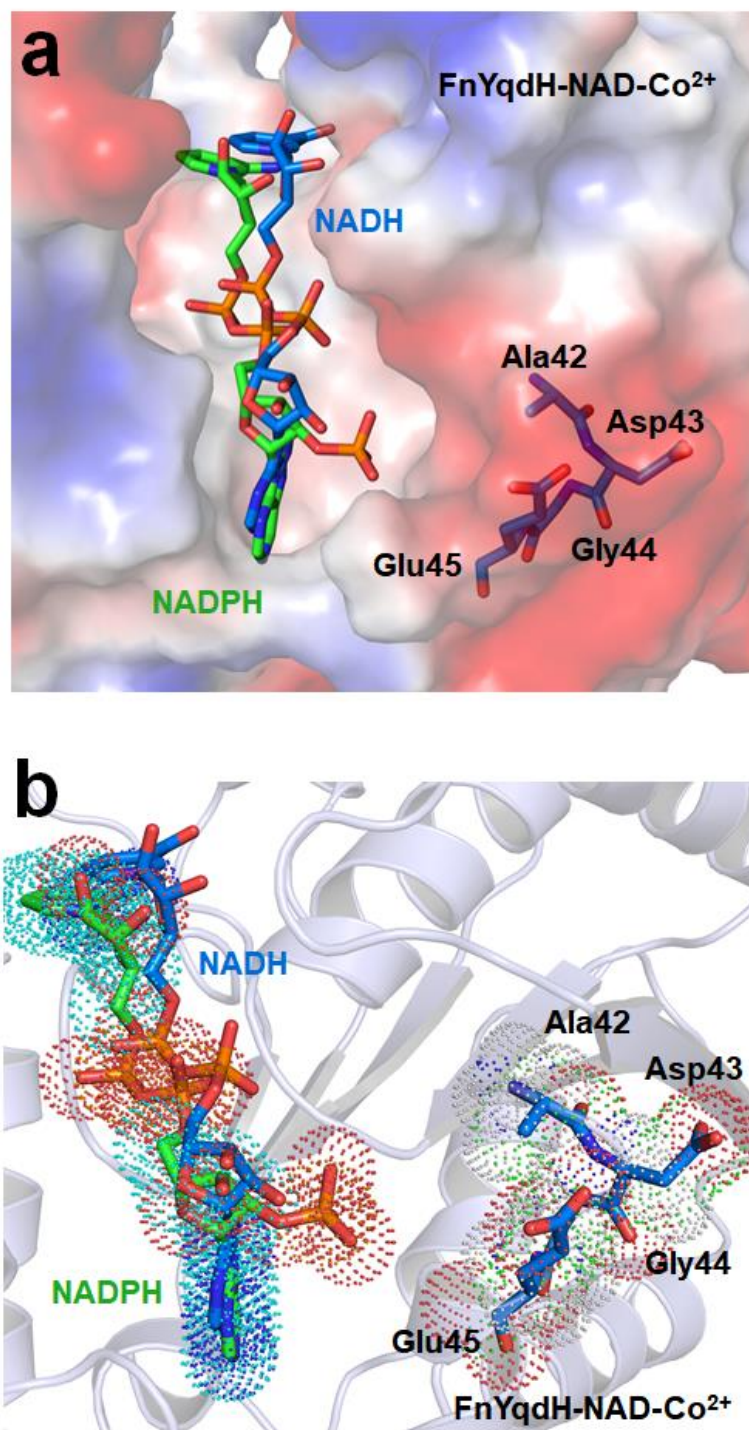

Figure S11. (a) The surface structure of the NAD(P)H-binding pocket of FnYqdh-NAD-Co<sup>2+</sup>, NADH is colored blue and NADPH is colored green. (b) Spatial distribution of NAD(P)H-binding pocket and NAD(P)H.

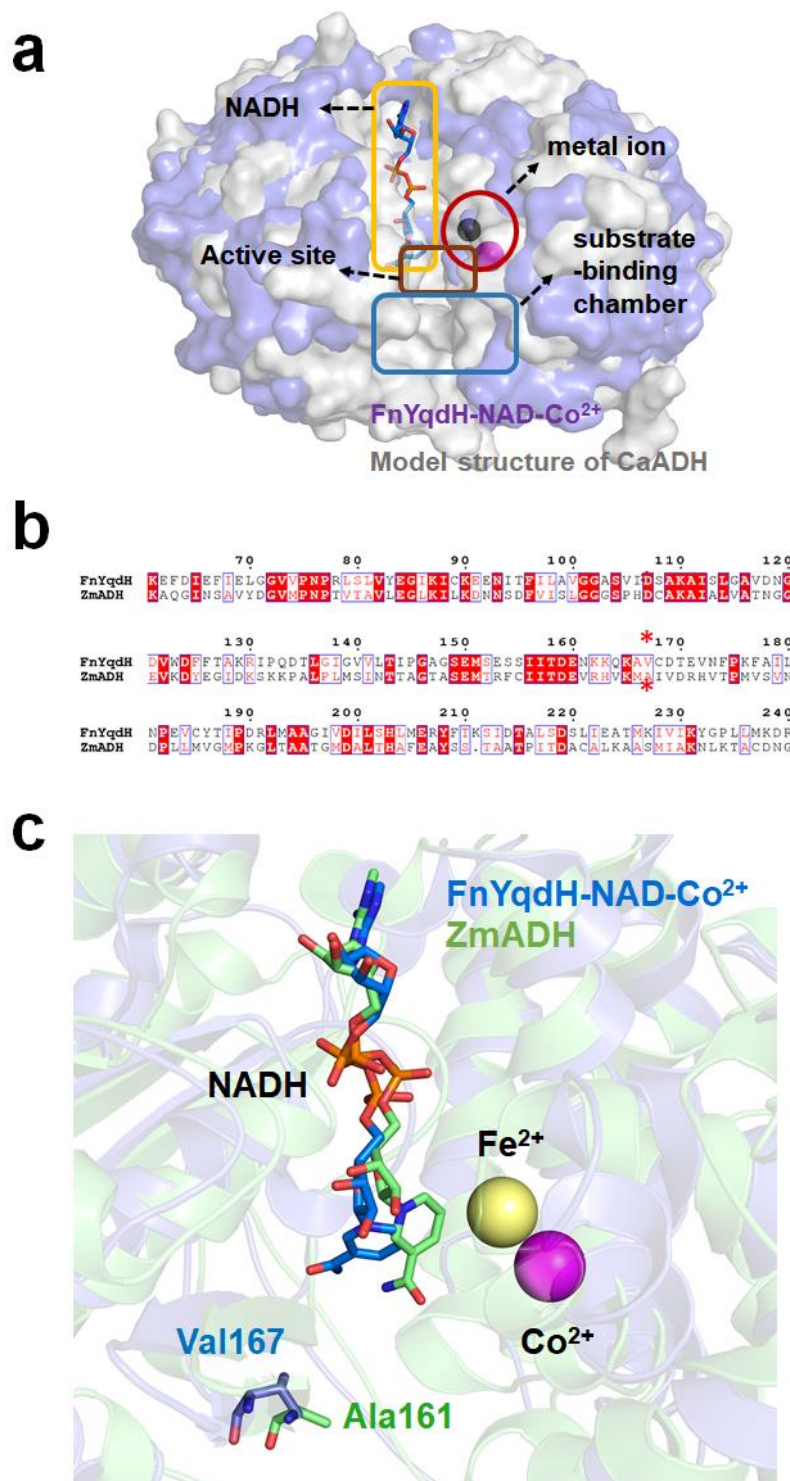

**Figure S12.** Comparison of FnYqdh-NAD-Co<sup>2+</sup> and other structures. (a) Schematic representation of FnYqdh-NAD-Co<sup>2+</sup> (colored blue) and CaADH (model structure, colored grey). (b) Partial sequence alignment of FnYqdh and ZmADH. The substrate-binding site of ZmBDH is indicated by a red \*. (c) Comparison of FnYqdh-NAD-Co<sup>2+</sup> (colored marine [blue]) and ZmADH (colored green).



**Table S1. Sequence of Primers.**

| Primers        | Sequence                                          |
|----------------|---------------------------------------------------|
| F-FnYqdH-WT    | GGG <u>CCATGG</u> ATATGGACAATTTTAATTATAAAAATGATAC |
| R-FnYqdH-WT    | GGG <u>CTCGAG</u> TTATTTTGCTAAATTTAAGATA          |
| F-FnYqdH-E41A  | CTCTTGCATTAT <u>GCA</u> GCAGATGGAGAA              |
| R-FnYqdH-E41A  | TTCTCCATCTGC <u>TGC</u> ATAATGCAAGAG              |
| F-FnYqdH-G44A  | ATGAGGCAGAT <u>GCA</u> GAATTAATAA                 |
| R-FnYqdH-G44A  | TTATTAATTC <u>TGC</u> ATCTGCCTCAT                 |
| F-FnYqdH-L46A  | GCAGATGGAGAA <u>GCA</u> ATAAAAAAACTT              |
| R-FnYqdH-L46A  | AAGTTTTTTTAT <u>TGC</u> TTCTCCATCTGC              |
| F-FnYqdH-S104A | GTTGGTGGAGCA <u>GCA</u> AGTTATTGACTCA             |
| R-FnYqdH-S104A | TGAGTCAATAAC <u>TGC</u> TGCTCCACCAAC              |
| F-FnYqdH-D107A | GCAAGTGTTATT <u>GCA</u> TCAGCTAAAGCA              |
| R-FnYqdH-D107A | TGCTTTAGCTGA <u>TGC</u> AATAACACTTGC              |
| F-FnYqdH-T143A | GGTTGTTTTA <u>GCA</u> ATTCCAGGAGCT                |
| R-FnYqdH-T143A | AGCTCCTGGAAT <u>TGC</u> TAAAACAACC                |
| F-FnYqdH-S152A | GGTTCTGAAATG <u>GCA</u> GAAAGCTCTATT              |
| R-FnYqdH-S152A | AATAGAGCTTTC <u>TGC</u> CATTTCAGAACC              |
| F-FnYqdH-K165A | AATAAGAAACAA <u>GCA</u> GCTGTTTGTGAT              |
| R-FnYqdH-K165A | ATCACAAACAGC <u>TGC</u> TTGTTTCTTATT              |
| F-FnYqdH-T187A | GAAGTTTGTTAT <u>GCA</u> ATTCCTGATAGA              |
| R-FnYqdH-T187A | TCTATCAGGAAT <u>TGC</u> ATAACAACTTC               |
| F-FnYqdH-D199A | GCTGGAATTGTA <u>GCA</u> ATTTTATCACAT              |
| R-FnYqdH-D199A | ATGTGATAAAAT <u>TGC</u> TACAATTCCAGC              |
| F-FnYqdH-H203A | GATATTTTATCA <u>GCA</u> TTAATGGAAAGA              |
| R-FnYqdH-H203A | TCTTTCCATTAAT <u>TGC</u> TGATAAAATATC             |
| F-FnYqdH-E206A | TCACATTTAATG <u>GCA</u> AGATATTTTACA              |
| R-FnYqdH-E206A | TGTAAATATCT <u>TGCC</u> CATTAAATGTGA              |
| F-FnYqdH-H272A | GATTGGGCTTCC <u>GCA</u> AGAATTGAACAT              |
| R-FnYqdH-H272A | ATGTTCAATTCT <u>TGC</u> GGAAGCCCAATC              |
| F-FnYqdH-H286A | TATGATTTGACT <u>GCA</u> GGTATTGGTATG              |
| R-FnYqdH-H286A | CATACCAATACC <u>TGC</u> AGTCAAATCATA              |

The *Nco*I and *Xho*I restriction sites are underlined. The mutant sites are marked red color with underlined.
